1  
2  
3  
4  
5  
6  
7  
8  
9  
10  
11  
12  
13  
14  
15  
16  
17

**Risk perceptions and preventive practices of COVID-19 among healthcare professionals in public hospitals in Ethiopia**

Wakgari Deressa<sup>1\*</sup>, Alemayehu Worku<sup>1</sup>, Workeabeba Abebe<sup>2</sup>, Muluken Gizaw<sup>1</sup>, Wondwosson Amogne<sup>3</sup>

1. Department of Preventive Medicine, School of Public Health, College of Health Sciences, Addis Ababa University, Addis Ababa, Ethiopia
2. Department of Pediatrics and Child Health, School of Medicine, College of Health Sciences, Addis Ababa University, Addis Ababa, Ethiopia
3. Department of Internal Medicine, School of Medicine, College of Health Sciences, Addis Ababa University, Addis Ababa, Ethiopia

\*Corresponding author

Short title: Risk perceptions and preventive practices of COVID-19 among healthcare professionals

18 **Abstract**

19 Healthcare professionals are at higher risk of contracting the novel coronavirus due to their work  
20 exposure in the healthcare settings. Practicing appropriate preventive measures to control COVID-  
21 19 infection is one of the most important interventions that healthcare workers are expected to use.  
22 The aim of this study was to assess the level of risk perception and practices of preventive measures  
23 of COVID-19 among health workers in Addis Ababa, Ethiopia. A hospital-based cross-sectional  
24 study was conducted from 9<sup>th</sup> to 26<sup>th</sup> June 2020 among healthcare professionals working at six  
25 public hospitals in Addis Ababa. Data were collected using a self-administered structured  
26 questionnaire. Frequency, percentage, and mean were used to summarize the data. A binary  
27 logistic regression analyses were performed to identify factors associated with risk perception  
28 about COVID-19. A total of 1,134 participants were surveyed. Wearing facemask (93%), hand  
29 washing for at least 20 seconds (93%), covering mouth and nose while coughing or sneezing  
30 (91%), and avoiding touching eyes, nose, and mouth (91%) were the commonly self-reported  
31 preventive practices. About 88% perceived that they were worried about the risk of becoming  
32 infected with coronavirus, and majority (91%) worried about the risk of infection to their family.  
33 The mean score of overall fear and worry of COVID-19 was 2.37 on a scale of 1 to 3. Respondents  
34 who ever provided clinical care to COVID-19 patients were more likely to report fear and worry  
35 (adjusted OR=1.34, 95% CI:1.02-1.91), however those who ever participated in Ebola or SARS  
36 outbreaks were less likely to report fear and worry due to COVID-19 crisis (adjusted OR=0.66,  
37 95% CI:0.48-0.90). This study has revealed widespread practices of preventive measures and the  
38 highest perceived risk of COVID-19 among healthcare workers. Therefore, an effective risk  
39 communication intervention should be implemented to ensure the maintenance of appropriate  
40 practices during the current COVID-19 pandemic.

41

42 **Keywords:** *Coronavirus, COVID-19, Ethiopia, Healthcare professionals, Preventive practices,*  
43 *Risk perception, SARS-COV-2*

44

## 45 **Introduction**

46 The novel coronavirus disease 2019 (COVID-19) that was declared as a pandemic by the World  
47 Health Organization (WHO) on the 11<sup>th</sup> of March 2020 [1] has affected over 37 million people  
48 and has caused more than one million deaths globally as of 12<sup>th</sup> October 2020 [2]. The new severe  
49 acute respiratory syndrome coronavirus 2 (SARS-CoV-2) has now spread to 213 countries and  
50 territories around the world. Up to 20<sup>th</sup> September 2020, Ethiopia reported a total of 68,820  
51 confirmed coronavirus disease 2019 (COVID-19) cases and 28,314 recoveries from over  
52 1,202,818 total tests, among whom 1,096 have died [3]. Over 1,311 health workers have contracted  
53 coronavirus in Ethiopia as of 17<sup>th</sup> September 2020.

54

55 Healthcare providers who are in the healthcare settings to care for the COVID-19 patients are  
56 highly vulnerable to SARS-COV-2 infection [4]. Most healthcare workers are working in isolation  
57 units, critical care units, intensive care units (ICUs), emergency units, working in frontline  
58 positions, and having contact with suspected and confirmed COVID-19 cases. During the early  
59 stage of COVID-19 pandemic in the USA, the prevalence of SARS-CoV-2 infection among  
60 healthcare workers was 7.3% and particularly, infections were most common among nurses [5]. In  
61 the south of the Netherlands, 96 (5%) of 1796 health care workers screened in three hospitals were  
62 tested positive for SARS-CoV-2 just 10 days after the first reported COVID-19 case in the country  
63 [6]. More than 278 physicians from almost all medical specialties have died due to COVID-19 as  
64 of 15 April 2020 with the majority (44%) from Italy mainly because of lack understanding of the  
65 virus and its preventive measures [7]. Studies in China reported 3,387 COVID-19 cases among  
66 HCWs (4.4% of all cases), with 23 attributable deaths [8]. In some countries at the peak of their  
67 infection, such as Spain, they have reported that 13% to 14% of the country's cases were in

68 healthcare workers [9]. Overall, as much as 10% of healthcare workers are infected with SARS-  
69 CoV-2 in some countries [4] and the WHO has developed infection prevention and control  
70 guidance to be implemented at the national and healthcare facility level in order to reduce  
71 coronavirus infection among healthcare workers [10].

72

73 Studies have identified major sources of worry and anxiety among healthcare professionals due to  
74 lack of appropriate PPE; being exposed to COVID-19 at work and taking the infection home to  
75 their family; not having rapid access to testing if they develop COVID-19 symptoms and  
76 concomitant fear of propagating infection at work; uncertainty that their organization will  
77 support/take care of their personal and family needs if they develop infection; access to childcare  
78 during increased work hours and school closures; and support for other personal and family needs  
79 as work hours and demands increase [11]. A recent qualitative study from China reported the  
80 challenges facing frontline healthcare workers during the COVID-19 outbreak, including a high  
81 risk of infection, insufficient PPE, heavy workloads and manpower shortages, confusion,  
82 discrimination, isolation, separation from their families, and burnout [12]. Under these stressful  
83 conditions, healthcare professionals have been challenged to effectively engaged in the fight  
84 COVID-19.

85

86 A good level of understanding the risk perception and preventive practices of healthcare  
87 professionals is essential to protect the health workers and prevent the COVID-19 pandemic  
88 through effective risk communication. Studies conducted during the early stages of a pandemic  
89 have suggested that perceived personal risk of infection and the health effects are linked to  
90 engagement in protective behaviors [13]. Since the occurrence of the epidemic in Ethiopia, the

91 MoH, in collaboration with its partners, conducted different trainings on preventive measures for  
92 healthcare professionals at several hospitals and health centers, with supplies of PPE materials.  
93 However, so far, no study has been undertaken in Ethiopia on risk perception and preventive  
94 practices of healthcare professionals during the current COVID-19 pandemic. In addition, levels  
95 of confidence and feelings of healthcare workers about COVID-19 are unknown. It was therefore  
96 necessary to carry out this study to investigate the level of risk perception and preventive practice  
97 of healthcare professionals towards the COVID-19.

98

## 99 **Methods**

### 100 **Study setting and design**

101 This hospital-based cross-sectional study was conducted from 9<sup>th</sup> to 26<sup>th</sup> June 2020 at six public  
102 hospitals in Addis Ababa city administration, three months after the first confirmed COVID-19  
103 case in Ethiopia in March 2020. Addis Ababa city is the most populated urban city in the country,  
104 and had a population of about 3.6 million in 2019 [14]. The city also had better health infrastructure  
105 and the highest number of qualified medical personnel compared with any city or region in the  
106 country. There were 12 hospitals and close to 100 health centers belonging to the public center,  
107 and about 25 private hospitals in Addis Ababa city. There were also over 17,000 healthcare  
108 professionals in the city, including 2,441 (14%) physicians and 8,172 (47%) nurses by the end of  
109 July 2019 (MOH 2011 EC Health Indicators). The hospitals selected for the current study provide  
110 outpatient and inpatient services for the city residents and patients coming from different parts of  
111 the country.

112

113

## 114 **Study population and sampling**

115 The study was conducted among all healthcare professionals working in the different clinical  
116 departments or units of six public hospitals in Addis Ababa, mainly Gyn&Ob, Surgery, Pediatrics,  
117 Internal Medicine, OPD, emergencies, intensive care, operation room/ward, screening/triage,  
118 laboratory and anesthesia. The selected hospitals included: Tikur Anbessa Specialized Hospital  
119 (TASH), Zewditu Memorial Hospital (ZMH), Ghandi Memorial Hospital (GMH), Menelik II  
120 Hospital, Yekatit 12 Hospital Medical College (Y12HMC) and St. Paul Hospital Millennium  
121 Medical College (SPHMMC). The study population included intern doctors, resident doctors,  
122 general practitioners, medical specialists and sub-specialists, health officers, anesthetists, nurses,  
123 midwives, pharmacists, laboratory technologists, physiotherapists, X-ray and laboratory  
124 technicians, all of whom may expect to encounter suspected or confirmed COVID-19 patients.

125  
126 A multi-stage sampling, using a mix of purposive and non-random sampling, was applied to select  
127 the study participants. In the first stage, the six hospitals were purposively selected from 12  
128 hospitals in the city. In the second stage, clinical departments or units were selected, and in the  
129 third stage, study participants were selected proportionally to the estimated number of healthcare  
130 professionals working in different departments and units of the hospital. All eligible participants  
131 in each department/unit who consented to participate were recruited into the study. Since COVID-  
132 19 is a new disease, we assumed that at least 50% of study participants had higher risk perception  
133 regarding COVID-19, and the estimated sample size was calculated with 95% confidence limit,  
134 with 4% precision and a design effect equal to 1.5 using 20 % non-response rate. Accordingly, the  
135 minimum total sample size targeted for this survey was 1,080 respondents. A total of 1,200  
136 participants were targeted for the study.

137

## 138 **Data Collection**

139 A structured paper-based self-administered questionnaire was used to collect the data. The  
140 questionnaire is composed of parts on the demographic (gender, age) and occupational  
141 characteristics of the respondents (hospital, department/unit, professional category, and work  
142 experience), as well as their preparedness to combat COVID-19, potential risk of becoming  
143 infected with the virus, worries about the potential risk to their family and loved ones, feelings and  
144 fears about COVID-19. Questions related to measures taken to prevent infection from the virus  
145 included hand washing for at least 20 seconds, use of disinfectants, wearing facemask, physical  
146 distancing, covering mouth and nose while coughing and sneezing and other preventive measures.  
147 The questionnaire was developed in English by the authors of the study based on the previously  
148 conducted studies and visiting the WHO websites for frequently asked questions on risk perception  
149 of healthcare professionals. Most of the questions were designed as ‘yes/no’, ‘agree/disagree’, and  
150 ‘worried/not worried’ using different rating scales.

151

152 A total of 12 experienced data collectors with health backgrounds were involved in the data  
153 collection of this survey. A guideline was developed by the research team to guide the data  
154 collectors and supervisors for data collection, quality assurance of data and ethical conduct.  
155 Training and orientation on the survey tool and methodology including how to administer the SAQ  
156 were conducted for the data collectors using webinar on 2<sup>nd</sup> June 2020. After explaining the  
157 purpose of the study and obtaining written or oral informed consent, study participants were given  
158 a paper-based questionnaire at their workplace and they filled out their own questionnaires. The  
159 purpose of the study was clearly stated in the questionnaire and the participants were asked to



160 complete the questionnaire with honest answers after giving their consents. The study participants  
161 were encouraged to fill out the questionnaire whilst the data collectors were still in the hospital  
162 during the data collection period. A collection center was also prepared in the Hospital Director's  
163 office to also gather the questionnaires from the healthcare workers that were unable to directly  
164 deliver the completed questionnaires to the data collectors. The data collection took place  
165 simultaneously in the six hospitals. The questionnaires were checked for completeness and  
166 consistency upon collection. All responses were anonymous.

167  
168 Risk perception among the healthcare professionals in this study was measured using questions on  
169 perceived fears and worries, vulnerability and feelings, and behavioral responses regarding  
170 COVID-19 [15-16]. Preventive practices of COVID-19 in this study include hygiene behaviors  
171 (such as hand washing; covering mouth and nose with a hand or tissue while coughing or sneezing;  
172 avoiding touching eyes, nose and mouth with unwashed hands; using hand sanitizer; disinfecting  
173 surfaces); mask wearing, physical distancing and avoiding crowds and public places [17].

174  
175 **Data analysis**  
176 Data were entered into the Census Surveys Professional (CSPro) Version 7.2 statistical software  
177 package and subsequently exported to SPSS version 23.0 (SPSS Inc., IBM, USA) for cleaning and  
178 data analysis. Descriptive analysis was applied to calculate the frequencies, proportions and mean  
179 scores, and the results were presented as a proportion for the categorical variables, and as a mean  
180  $\pm$  standard deviation for the quantitative variables. A Chi-square was used to establish significance  
181 and relationship between variables. The study participants were asked 12 questions related to their  
182 fears and worries (risk perception) about COVID-19, such as losing someone they love due to the

183 disease, health system overcrowding, mental and physical health, etc., on a 3-point scale, where  
184 1=don't worry at all, 2=worry somehow and 3=worry a lot. A sum of scores (ranged 12-36) was  
185 made and the level was classified into two groups using the Visual Binning in SPSS (low  
186 fear/worry  $\leq 29$  and high fear/worry  $> 29$  score). Univariate odds ratios (crude OR) and multivariate  
187 odds ratio (adjusted OR) were derived by using univariate and multivariate logistic regression  
188 models, respectively, to identify the main factors associated with healthcare workers high risk  
189 perception. Statistical significance was considered for  $P < 0.05$ . The internal consistency  
190 (reliability) of the questions was tested by applying Cronbach's alpha and the Cronbach's alpha  
191 coefficient of the reliability of scale was estimated at 0.91, which is highly acceptable.

192

### 193 **Ethical considerations**

194 The study protocol was reviewed and approved by the Institutional Review Board of the College  
195 of Health Sciences at Addis Ababa University (AAU). Permission to undertake this study was  
196 obtained from every relevant authority at all levels. Official letters from AAU were written to each  
197 hospital to cooperate and participate in the survey. The purpose and significance of the study was  
198 introduced to the study participants, and all participants provided written or oral consent before  
199 participating in the study. Anonymity and data confidentiality were ensured, and no identifiable  
200 data from participants were collected. All study respondents were asked to only fill the  
201 questionnaire once to avoid duplication of data and that their participation in the study was entirely  
202 on voluntary basis. All personnel involved in the survey received orientation on COVID-19  
203 infection prevention and control measures.

204

205

## 206 **Results**

### 207 **Characteristics of study participants**

208 A total of 1,134 (92%) healthcare professionals consented and completed the questionnaires, out  
209 of 1,228 possible participants from six public hospitals in Addis Ababa. Among 1,134 healthcare  
210 personnel, nearly 40% of them were nurses, followed by physicians (22.4%) and interns (10.8%).  
211 Table 1 summarizes the demographic and occupational characteristics of the study participants and  
212 their professional affiliation. Among 1,102 respondents reporting gender, 45.9% were males, with  
213 females making 51.3% of all respondents. Among 982 participants with available data on age, the  
214 mean ( $\pm$ SD) age was  $30.3\pm 6.4$  years and ranged from 22 to 70 years old, with the majority within  
215 the age group of 20-29 years (57.9%) ( $31.0\pm 5.6$  years for physicians,  $25.6\pm 3.3$  years for interns  
216 and  $30.7\pm 6.5$  years for nurses). Among 252 physicians participated in the study, general  
217 practitioners and resident doctors accounted for 44.8% and 42.9%, respectively, while medical  
218 specialists and sub-specialists accounted for the remaining 12.3%. About 17% of the respondents  
219 represented other professional categories such as anesthetist, pharmacist, health officer,  
220 radiographer and laboratory technologist. Majority (17.2%) of the respondents worked in Gny&Ob  
221 department, while 13.8% were in surgical department, 13.3% in pediatrics, 13.0% in medical and  
222 10.5% in OPD departments. Most respondents worked as staff for less than 10 years in the hospital  
223 (73.2%), and nearly 10% worked for 10 or more years.

224

225 Table 1. Characteristics of study participants by professional category (n=1134)

| Characteristics           | Professional category, n (%) |              |              |              |              | Total, n (%) |
|---------------------------|------------------------------|--------------|--------------|--------------|--------------|--------------|
|                           | Physician                    | Intern       | Nurse        | Midwife      | Other*       |              |
| Gender (n=1134)           |                              |              |              |              |              |              |
| Male                      | 157 (62.3)                   | 58 (47.2)    | 175 (38.6)   | 44 (37.6)    | 103 (54.5)   | 537 (47.4)   |
| Female                    | 95 (37.7)                    | 65 (52.8)    | 278 (61.4)   | 73 (62.4)    | 86 (45.6)    | 597 (52.6)   |
| Age group (years) (n=982) |                              |              |              |              |              |              |
| 20-29                     | 101 (45.9)                   | 99 (91.7)    | 220 (57.0)   | 80 (79.2)    | 69 (41.3)    | 569 (57.9)   |
| 30-39                     | 106 (48.2)                   | 8 (7.4)      | 119 (30.8)   | 14 (13.9)    | 70 (41.9)    | 317 (32.3)   |
| ≥40                       | 13 (5.9)                     | 1 (0.9)      | 47 (12.2)    | 7 (6.9)      | 28 (16.8)    | 96 (9.8)     |
| Mean (±SD)                | 31.0 (±5.6)                  | 25.6 (±3.3)  | 30.7 (±6.5)  | 28.3 (±5.7)  | 32.6 (±7.5)  | 30.3 (±6.4)  |
| Median (Range)            | 30.0 (22-70)                 | 25.6 (22-45) | 30.7 (22.57) | 28.3 (22-52) | 32.3 (23-60) | 30.3 (22-70) |
| Department/Unit (n=1134)  |                              |              |              |              |              |              |
| Gyn&Ob                    | 27 (10.7)                    | 31 (25.2)    | 36 (7.9)     | 97 (82.9)    | 4 (2.1)      | 195 (17.2)   |
| Surgical                  | 43 (17.1)                    | 31 (25.2)    | 65 (14.3)    | 2 (1.7)      | 16 (8.5)     | 157 (13.8)   |
| Pediatrics                | 39 (15.5)                    | 35 (28.5)    | 71 (15.7)    | 2 (1.7)      | 4 (2.1)      | 151 (13.3)   |
| Medical                   | 62 (24.6)                    | 17 (13.8)    | 62 (13.7)    | 0.0          | 6 (3.2)      | 147 (13.0)   |
| OPD/Screening/Triage      | 16 (6.3)                     | 2 (1.6)      | 83 (18.3)    | 6 (5.1)      | 37 (19.6)    | 144 (12.7)   |
| Emergency                 | 28 (11.1)                    | 4 (3.3)      | 34 (7.5)     | 10 (8.5)     | 19 (10.1)    | 95 (8.4)     |
| Anesthesia/OR/IC          | 12 (4.8)                     | 1 (0.8)      | 66 (14.6)    | 0.0          | 14 (7.4)     | 93 (8.2)     |
| Other***                  | 25 (9.9)                     | 2 (1.6)      | 36 (7.9)     | 0.0          | 89 (47.1)    | 152 (13.4)   |
| Hospital (n=1134)***      |                              |              |              |              |              |              |
| TASH                      | 79 (31.3)                    | 17 (13.8)    | 128 (28.3)   | 19 (16.2)    | 40 (21.2)    | 283 (25.0)   |
| ZMH                       | 39 (15.5)                    | 36 (29.3)    | 54 (11.9)    | 15 (12.8)    | 33 (17.5)    | 177 (15.6)   |
| GMH                       | 17 (6.7)                     | 7 (5.7)      | 51 (11.3)    | 21 (17.9)    | 19 (10.1)    | 115 (10.1)   |
| Y12HMC                    | 35 (13.9)                    | 12 (9.8)     | 48 (10.6)    | 15 (12.8)    | 42 (22.2)    | 152 (13.4)   |
| MH                        | 39 (15.5)                    | 29 (23.6)    | 68 (15.0)    | 20 (17.1)    | 18 (9.5)     | 174 (15.3)   |
| SPHMMC                    | 43 (17.1)                    | 22 (17.9)    | 104 (23.0)   | 27 (23.1)    | 37 (19.6)    | 233 (20.5)   |
| Work experience (n=938)   |                              |              |              |              |              |              |
| <5                        | 167 (79.5)                   | 84 (90.3)    | 168 (44.0)   | 65 (67.0)    | 68 (43.6)    | 552 (58.8)   |
| 5-9                       | 33 (15.7)                    | 7 (7.5)      | 160 (41.9)   | 25 (25.8)    | 53 (34.0)    | 278 (29.6)   |
| 10-14                     | 5 (2.4)                      | 2 (2.2)      | 29 (7.6)     | 4 (4.1)      | 21 (13.5)    | 61 (6.5)     |
| 15-34                     | 15 (2.4)                     | 0.0          | 25 (6.5)     | 3 (3.1)      | 14 (9.0)     | 47 (5.0)     |
| Total, n (%)              | 252 (22.2)                   | 123 (10.8)   | 453 (39.3)   | 117 (10.3)   | 189 (16.7)   | 1134 (100)   |

226 \*Other: Includes anesthetist, pharmacist, health officer, lab technologist and radiographer.

227 \*\*Other: Includes Isolation room/ward, Pharmacy, Oncology, etc.

228 \*\*\*TASH: Tikur Anbessa Specialized Hospital; ZMH: Zewditu Memorial Hospital; GMH:Ghandi Memorial Hospital; Y12HMC: Yekatit 12

229 Hospital Medical College; MH: Menelik II Hospital; SPHMMC: St. Paul Hospital Millennium Medical College.

230

### 231 COVID-19 preventive practices

232 The self-reported prevalence of different preventive measures practiced by healthcare

233 professionals to prevent themselves from coronavirus infection is shown in Table 2. The overall

234 highest practice showed among healthcare participants were wearing facemask (93%), hand

235 washing for at least 20 seconds (92.7%), covering mouth and nose when coughing or sneezing

236 (90.9%), and avoiding touching eyes, nose, and mouth with unwashed hands (90.5%). These

237 measures were commonly reported (>90%) for physicians, intern doctors, nurses and other

238 healthcare professionals except the midwives who reported <90%. A lower percentage of self-  
 239 reported practices were observed in physical distancing (84.3%), the use of disinfecting surfaces  
 240 (76.1%), and staying home when feeling cold or sick (64.6%), with similar pattern across the  
 241 different categories of healthcare workers.

242 Table 2. Self-reported prevalence of preventive measures practiced by healthcare professionals to  
 243 prevent coronavirus infection by professional category (n=1134)

| Variable                                                                                    | Professional category, % |               |              |                |               | Total, %   |
|---------------------------------------------------------------------------------------------|--------------------------|---------------|--------------|----------------|---------------|------------|
|                                                                                             | <i>Physician</i>         | <i>Intern</i> | <i>Nurse</i> | <i>Midwife</i> | <i>Other*</i> |            |
| Wearing face mask                                                                           | 95.6                     | 95.9          | 90.9         | 89.7           | 94.7          | 93.0       |
| Hand washing for at least 20 seconds                                                        | 95.2                     | 95.1          | 90.9         | 88.9           | 94.2          | 92.7       |
| Covering your mouth and nose when you cough or sneeze                                       | 93.7                     | 96.7          | 89.0         | 87.2           | 90.5          | 90.9       |
| Avoiding touching your eyes, nose, and mouth with unwashed hands                            | 90.9                     | 92.7          | 90.1         | 88.0           | 91.0          | 90.5       |
| Use of disinfectants to clean hands when water and soap was not available for washing hands | 92.9                     | 93.5          | 83.9         | 83.8           | 90.5          | 88.0       |
| Physical distancing                                                                         | 84.1                     | 85.4          | 85.9         | 79.5           | 83.1          | 84.3       |
| Disinfecting mobile phone                                                                   | 84.2                     | 82.1          | 83.4         | 84.6           | 83.6          | 83.6       |
| Disinfecting surfaces                                                                       | 73.0                     | 73.2          | 79.0         | 74.4           | 76.2          | 76.1       |
| Staying home when you were sick or when you had a cold                                      | 63.1                     | 65.9          | 66.9         | 61.5           | 62.4          | 64.6       |
| Total, n (%)                                                                                | 252 (22.2)               | 123 (10.8)    | 453 (39.3)   | 117 (10.3)     | 189 (16.7)    | 1134 (100) |

244  
 245 This study also investigated the attitude of the healthcare workers with regard to which group of  
 246 people they recommend to use a facemask or N95 respirator. The vast majority of the respondents  
 247 (94.8%) recommended the use of a facemask by all healthcare professionals, all healthy people to  
 248 protect themselves from coronavirus infection (90.1%), and people with close contact with  
 249 suspected or confirmed COVID-19 (88.8%). About 87% of all respondents suggested that N95  
 250 respirator should be used by all healthcare professionals as well as by people who are being in

251 close contact with suspected or confirmed COVID-19 patients. About five in 10 (48%) of the  
252 respondents recommended the use of N95 respirator by healthy people to protect themselves  
253 against coronavirus infection. About 65% and 48% of the respondents from TASH and SPHMMC,  
254 respectively, recommended the use of N95 respirator for all healthy people to protect themselves  
255 from COVID-19.

256

### 257 **Exposure and preparedness in providing care to COVID-19 and other infectious disease** 258 **outbreaks**

259 Only about one-third (30.7%) of the study participated reported that they ever participated in direct  
260 clinical care to patients affected by infectious disease outbreaks such as Ebola, SARS and cholera.  
261 Nearly three in 10 (28.9%, n=328) respondents reported that they ever provided direct clinical care  
262 to at least one suspected/confirmed COVID-19 patient, with 39.1% participants from SPHMMC,  
263 34.5% from MH and 31.1% from TASH. Regarding the level of preparedness of healthcare  
264 professionals to provide direct clinical care to COVID-19 patients, 33.6% (n=381) reported that  
265 they were prepared to provide direct clinical care to COVID-19 patients. In contrast, about two-  
266 third (66.4%) of the healthcare workers reported that they were not prepared to manage COVID-  
267 19 patients.

268

### 269 ***Risk perception of healthcare professionals due to their role in the COVID-19 pandemic***

270 The study participants were asked questions about their personal health, potential risks of  
271 becoming infected with COVID-19 or the potential risks to their families and loved ones due to  
272 their clinical role in the hospital. About 30% and 43% of the participants somewhat or strongly  
273 worried, respectively, that their personal health is at risk during the COVID-19 pandemic due to  
274 their role in the hospital (Table 3). Nevertheless, 6% and 13.5% of respondents reported that they

275 somewhat not worried or even not worried at all that their personal health was not at risk due to  
 276 COVID-19. About 38% and 50% of all respondents perceived that they were somewhat worried  
 277 or extremely worried about themselves, respectively, due to the potential risk of becoming infected  
 278 with coronavirus by their clinical role in the hospital setting these days, with only 5.6% perceived  
 279 that they were not worried about the risk of being infected with the virus. Majorities of the  
 280 respondents (64.4%) extremely worried about the potential risk of infection to their family and  
 281 loved ones, and the remaining 26.7% were somewhat worried. Only 4.4% of the respondents were  
 282 not worried about the risk of COVID-19 to their family and loved ones.

283  
 284 Table 3. Healthcare professional’s worry about their clinical role in the hospital during COVID-  
 285 19 by professional category (n=3 items)

| Variable                                                                                                                     | Professional category, %    |                          |                         |                           |                          |
|------------------------------------------------------------------------------------------------------------------------------|-----------------------------|--------------------------|-------------------------|---------------------------|--------------------------|
|                                                                                                                              | <i>Physician</i><br>(n=244) | <i>Intern</i><br>(n=120) | <i>Nurse</i><br>(n=431) | <i>Midwife</i><br>(n=108) | <i>Other*</i><br>(n=181) |
| How worried are you about your personal health due to your role in the hospital during COVID-19 pandemic?                    |                             |                          |                         |                           |                          |
| Extremely worried                                                                                                            | 47.1                        | 50.0                     | 39.7                    | 40.7                      | 42.0                     |
| Somewhat worried                                                                                                             | 35.2                        | 27.5                     | 25.5                    | 28.7                      | 37.0                     |
| Average                                                                                                                      | 4.9                         | 8.3                      | 9.5                     | 6.5                       | 5.5                      |
| Somewhat not worried                                                                                                         | 3.7                         | 5.0                      | 7.9                     | 7.4                       | 4.4                      |
| Not worried at all                                                                                                           | 9.0                         | 9.2                      | 17.4                    | 16.4                      | 11.0                     |
| How worried are you about the potential risk of becoming infected with COVID-19 due to your role in the hospital?            |                             |                          |                         |                           |                          |
| Extremely worried                                                                                                            | 47.1                        | 56.7                     | 48.5                    | 58.3                      | 46.4                     |
| Somewhat worried                                                                                                             | 47.5                        | 35.0                     | 34.8                    | 29.6                      | 40.3                     |
| Average                                                                                                                      | 3.3                         | 6.7                      | 8.6                     | 5.6                       | 6.6                      |
| Somewhat not worried                                                                                                         | 2.0                         | 1.7                      | 5.1                     | 2.8                       | 4.4                      |
| Not worried at all                                                                                                           | 0.0                         | 0.0                      | 3.0                     | 3.7                       | 2.2                      |
| How worried are you about the potential risk COVID-19 to your family, loved ones or others due to your role in the hospital? |                             |                          |                         |                           |                          |
| Extremely worried                                                                                                            | 66.8                        | 75.8                     | 61.9                    | 63.0                      | 60.2                     |
| Somewhat worried                                                                                                             | 29.5                        | 19.2                     | 25.5                    | 28.7                      | 29.3                     |
| Average                                                                                                                      | 2.5                         | 4.2                      | 7.4                     | 4.6                       | 5.0                      |
| Somewhat not worried                                                                                                         | 0.4                         | 0.8                      | 3.2                     | 2.8                       | 2.8                      |
| Not worried at all                                                                                                           | 0.8                         | 0.0                      | 1.9                     | 0.9                       | 2.8                      |

286

287 The study participants were asked 12 questions to quantify their fears and worries (risk perception)  
288 about COVID-19 crisis, on a 3-point scale, where 1=don't worry at all, 2=worry somehow and  
289 3=worry a lot. Of the total 1134 study participants, 952 (84%) had complete responses on all the  
290 12-items for computing the total score. About 66% of the respondents reported that they worried  
291 a lot about losing someone due to COVID-19, 66.7% worried a lot about the health of their loved  
292 ones, and 67.5% worried a lot about the health system being overloaded by the patients of COVID-  
293 19, followed by a lot of worries about the economic recession in the country (58%), and restricted  
294 access to food supplies (56.1%) (Table 4). The study also revealed that there were respondents  
295 who were ambivalent or didn't worry at all about COVID-19 crisis.

296

297



298 Table 4. Healthcare professional’s fears and worries about COVID-19 crisis by hospital (n=12 items)  
299

| Fear and worry question                 | Professional category, %    |                          |                         |                          |                          | Total, %<br>(n=952) |
|-----------------------------------------|-----------------------------|--------------------------|-------------------------|--------------------------|--------------------------|---------------------|
|                                         | <i>Physician</i><br>(n=221) | <i>Intern</i><br>(n=110) | <i>Nurse</i><br>(n=374) | <i>Midwife</i><br>(n=95) | <i>Other*</i><br>(n=152) |                     |
| Loosing someone I love                  |                             |                          |                         |                          |                          |                     |
| Don’t worry at all                      | 7.2                         | 10.0                     | 12.6                    | 15.8                     | 12.5                     | 11.3                |
| Worry somehow                           | 25.3                        | 19.1                     | 21.1                    | 22.1                     | 23.7                     | 22.4                |
| Worry a lot                             | 67.4                        | 70.4                     | 66.3                    | 62.1                     | 63.8                     | 66.3                |
| Health system being overloaded          |                             |                          |                         |                          |                          |                     |
| Don’t worry at all                      | 7.7                         | 5.5                      | 8.8                     | 9.5                      | 9.2                      | 8.3                 |
| Worry somehow                           | 17.2                        | 30.0                     | 24.1                    | 29.5                     | 27.0                     | 24.2                |
| Worry a lot                             | 75.1                        | 64.5                     | 67.1                    | 61.1                     | 63.8                     | 67.5                |
| My own mental health                    |                             |                          |                         |                          |                          |                     |
| Don’t worry at all                      | 19.9                        | 30.0                     | 22.2                    | 21.1                     | 25.0                     | 22.9                |
| Worry somehow                           | 44.8                        | 30.9                     | 35.6                    | 37.9                     | 36.2                     | 37.5                |
| Worry a lot                             | 35.3                        | 39.1                     | 42.2                    | 41.1                     | 38.8                     | 39.6                |
| My own physical health                  |                             |                          |                         |                          |                          |                     |
| Don’t worry at all                      | 11.8                        | 12.7                     | 17.4                    | 11.6                     | 17.8                     | 15.0                |
| Worry somehow                           | 45.2                        | 40.9                     | 38.8                    | 45.3                     | 38.2                     | 41.1                |
| Worry a lot                             | 43.0                        | 46.4                     | 43.9                    | 43.2                     | 44.1                     | 43.9                |
| My loved ones’ health                   |                             |                          |                         |                          |                          |                     |
| Don’t worry at all                      | 12.7                        | 8.2                      | 10.2                    | 10.5                     | 9.2                      | 10.4                |
| Worry somehow                           | 21.3                        | 14.5                     | 26.5                    | 26.3                     | 20.4                     | 22.9                |
| Worry a lot                             | 66.1                        | 77.3                     | 63.4                    | 63.2                     | 70.4                     | 66.7                |
| Restricted liberty of movement          |                             |                          |                         |                          |                          |                     |
| Don’t worry at all                      | 13.6                        | 18.2                     | 12.8                    | 13.7                     | 13.2                     | 13.8                |
| Worry somehow                           | 44.8                        | 41.8                     | 43.9                    | 43.2                     | 49.3                     | 44.6                |
| Worry a lot                             | 41.6                        | 40.0                     | 43.3                    | 43.2                     | 37.5                     | 41.6                |
| Small companies running out of business |                             |                          |                         |                          |                          |                     |
| Don’t worry at all                      | 10.9                        | 13.6                     | 14.2                    | 16.8                     | 12.5                     | 13.3                |
| Worry somehow                           | 50.2                        | 50.0                     | 37.2                    | 35.8                     | 38.2                     | 41.7                |
| Worry a lot                             | 38.9                        | 36.4                     | 48.7                    | 47.4                     | 49.3                     | 45.0                |
| Economic recession in my country        |                             |                          |                         |                          |                          |                     |
| Don’t worry at all                      | 7.7                         | 7.3                      | 9.1                     | 7.4                      | 10.5                     | 8.6                 |
| Worry somehow                           | 37.1                        | 47.3                     | 29.7                    | 36.8                     | 25.0                     | 33.4                |
| Worry a lot                             | 55.2                        | 45.5                     | 61.2                    | 55.8                     | 64.5                     | 58.0                |
| Restricted access to food supplies      |                             |                          |                         |                          |                          |                     |
| Don’t worry at all                      | 11.3                        | 5.5                      | 9.9                     | 6.3                      | 8.6                      | 9.1                 |
| Worry somehow                           | 37.1                        | 35.5                     | 31.6                    | 36.8                     | 37.5                     | 34.8                |
| Worry a lot                             | 51.6                        | 59.1                     | 58.6                    | 56.8                     | 53.9                     | 56.1                |
| Becoming unemployed                     |                             |                          |                         |                          |                          |                     |
| Don’t worry at all                      | 51.1                        | 27.3                     | 25.4                    | 22.1                     | 28.9                     | 31.8                |
| Worry somehow                           | 19.5                        | 27.3                     | 32.9                    | 32.6                     | 26.3                     | 28.0                |
| Worry a lot                             | 29.4                        | 45.5                     | 41.7                    | 45.3                     | 44.7                     | 40.1                |
| Not being able to pay my bills          |                             |                          |                         |                          |                          |                     |
| Don’t worry at all                      | 30.8                        | 23.6                     | 18.2                    | 17.9                     | 17.1                     | 21.5                |
| Worry somehow                           | 37.1                        | 33.6                     | 42.2                    | 43.2                     | 41.4                     | 40.0                |
| Worry a lot                             | 32.1                        | 42.7                     | 39.6                    | 38.9                     | 41.4                     | 38.4                |
| Unable to visit people who depend on me |                             |                          |                         |                          |                          |                     |
| Don’t worry at all                      | 10.9                        | 14.5                     | 8.8                     | 4.2                      | 12.5                     | 10.1                |
| Worry somehow                           | 32.6                        | 29.1                     | 34.8                    | 40.0                     | 27.6                     | 33.0                |
| Worry a lot                             | 56.6                        | 56.4                     | 56.4                    | 55.8                     | 59.9                     | 56.9                |

301 An overall fear and worry index about COVID-19 was created using 12 questions. The overall  
302 score for the scale was calculated by summing up the score of all questions (from 12 to 36). The  
303 higher the score, the greater the fear and worry of the COVID-19. Table 5 presents the mean scores  
304 for each and the overall worry indicators of COVID-19 crisis by professional category. Overall,  
305 the participants reported an average of moderate-to-high levels of COVID-19 worry (2.37) on each  
306 item, ranging from 2.1 on ‘becoming unemployed’ to 2.6 on ‘losing someone they love’, ‘health  
307 system being overloaded’ and ‘someone’s loved health’. The overall average worry score of the  
308 12 items for the COVID-19 crisis was high, with a mean ( $\pm$ SD) of 28.4 ( $\pm$ 5.9), ranging from 12 to  
309 36. The total average fear and worry scores for the hospitals ranged from 25.6 ( $\pm$ 6.8) at TASH to  
310 31.3 ( $\pm$ 5.0) at GMH; and was further categorized into three levels i.e. low, moderate, and high fear  
311 and worry level. Figure 1 shows the pattern of the total fear and worry scores of COVID-19 crisis,  
312 and about 56% of respondents from TASH showed a relatively low fear and worry score compared  
313 to the highest (50.9%) fear and worry score reported by participants from GMH.

314

315

316 Table 5. Mean fear and worry scores of healthcare professionals about COVID-19 crisis by  
 317 professional category (n=12 items)

318

| COVID-19 worry items               | Professional category, Mean (SD)* |                          |                         |                          |                          | Mean (SD)<br>(n=952) |
|------------------------------------|-----------------------------------|--------------------------|-------------------------|--------------------------|--------------------------|----------------------|
|                                    | <i>Physician</i><br>(n=221)       | <i>Intern</i><br>(n=110) | <i>Nurse</i><br>(n=374) | <i>Midwife</i><br>(n=95) | <i>Other*</i><br>(n=152) |                      |
| Losing someone I love              | 2.6 (0.6)                         | 2.6 (0.7)                | 2.5 (0.7)               | 2.5 (0.8)                | 2.5 (0.7)                | 2.6 (0.7)            |
| Health system being overloaded     | 2.7 (0.6)                         | 2.6 (0.6)                | 2.6 (0.6)               | 2.5 (0.7)                | 2.6 (0.7)                | 2.6 (0.6)            |
| My own mental health               | 2.2 (0.7)                         | 2.1 (0.8)                | 2.2 (0.8)               | 2.2 (0.8)                | 2.1 (0.8)                | 2.2 (0.8)            |
| My own physical health             | 2.3 (0.7)                         | 2.3 (0.7)                | 2.3 (0.7)               | 2.3 (0.7)                | 2.3 (0.7)                | 2.3 (0.7)            |
| My loved one's health              | 2.5 (0.7)                         | 2.7 (0.6)                | 2.5 (0.7)               | 2.5 (0.7)                | 2.6 (0.7)                | 2.6 (0.7)            |
| Restricted liberty of movement     | 2.7 (0.7)                         | 2.2 (0.7)                | 2.3 (0.7)               | 2.3 (0.7)                | 2.2 (0.7)                | 2.3 (0.7)            |
| Companies running out of business  | 2.3 (0.7)                         | 2.2 (0.7)                | 2.4 (0.7)               | 2.3 (0.7)                | 2.4 (0.7)                | 2.3 (0.7)            |
| Economic recession in my country   | 2.5 (0.6)                         | 2.4 (0.6)                | 2.5 (0.7)               | 2.5 (0.6)                | 2.5 (0.7)                | 2.5 (0.7)            |
| Restricted access to food supplies | 2.4 (0.7)                         | 2.5 (0.6)                | 2.5 (0.7)               | 2.5 (0.6)                | 2.6 (0.6)                | 2.5 (0.7)            |
| Becoming unemployed                | 1.8 (0.9)                         | 2.2 (0.8)                | 2.2 (0.8)               | 2.2 (0.8)                | 2.2 (0.8)                | 2.1 (0.8)            |
| Not being able to pay my bills     | 2.0 (0.8)                         | 2.2 (0.8)                | 2.2 (0.7)               | 2.2 (0.7)                | 2.2 (0.7)                | 2.2 (0.8)            |
| Not able to visit people           | 2.5 (0.6)                         | 2.4 (0.7)                | 2.5 (0.7)               | 2.5 (0.6)                | 2.5 (0.7)                | 2.5 (0.7)            |
| Overall mean (SD)                  | 27.9 (5.9)                        | 28.5 (5.6)               | 28.7 (6.1)              | 28.6 (5.8)               | 28.6 (5.7)               | 28.4 (5.9)           |

319 \*Numbers in parentheses represent standard deviations.

320  
 321  
 322 **Fig. 1. Pattern of fear and worry scores of COVID-19 crises by hospital**

323  
 324 The total fear and worry scores of COVID-19 was finally changed into binary using the Visual  
 325 Binning in SPSS (low fear/worry  $\leq 29$  and high fear/worry  $> 29$  score). Table 6 shows the results  
 326 of bivariate and multivariable logistic regression analyses of predictors associated with  
 327 respondents mean scores of fears and worries about COVID-19 crisis. In the bivariate analyses  
 328 departments/units and the hospitals were significantly associated with fear and worry scores of  
 329 COVID-19 crises. Nurses were 1.52 times more likely to report fear and worry (OR=1.52, 95%  
 330 CI:1.09-2.13,  $P < 0.015$ ), and healthcare workers who ever participated in clinical care to Ebola,  
 331 SARS and cholera patients were 0.67 times less likely to report fear and worry due to COVID-19  
 332 crisis (OR=1.67, 95% CI:0.51-0.88,  $P < 0.005$ ).

333

334 Table 6. Factors associated with worries about COVID-19 crisis in the study population using  
 335 multiple logistic regression analyses (n=952)

336

| Predictor                                                              | Fear and worry level, n (%) |                 | Crude OR (95% CI)* | P-value | Adjusted OR (95% CI) | P-value |
|------------------------------------------------------------------------|-----------------------------|-----------------|--------------------|---------|----------------------|---------|
|                                                                        | Low ( $\leq 29$ )           | High ( $> 29$ ) |                    |         |                      |         |
| Gender                                                                 |                             |                 |                    |         |                      |         |
| Male                                                                   | 255 (55.8)                  | 202 (44.7)      | 0.84 (0.65-1.09)   | 0.186   | 0.96 (0.73-1.28)     | 0.792   |
| Female                                                                 | 255 (51.5)                  | 240 (48.5)      | 1.0                |         | 1.0                  |         |
| Professional category                                                  |                             |                 |                    |         |                      |         |
| Physician                                                              | 131 (59.3)                  | 90 (40.7)       | 1.0                |         | 1.0                  |         |
| Intern                                                                 | 61 (55.4)                   | 49 (44.5)       | 1.17 (0.74-1.86)   | 0.507   | 0.78 (0.47-1.30)     | 0.336   |
| Nurse                                                                  | 183 (48.9)                  | 191 (51.1)      | 1.52 (1.09-2.13)   | 0.015   | 1.33 (0.91-1.93)     | 0.139   |
| Midwife                                                                | 54 (56.8)                   | 41 (43.2)       | 1.11 (0.68-1.80)   | 0.687   | 0.69 (0.37-1.26)     | 0.226   |
| Other***                                                               | 81 (53.3)                   | 71 (46.7)       | 1.28 (0.84-1.94)   | 0.252   | 1.37 (0.83-2.24)     | 0.218   |
| Department/Unit                                                        |                             |                 |                    |         |                      |         |
| Gyn&Ob                                                                 | 78 (45.9)                   | 92 (54.1)       | 1.0                |         |                      |         |
| Surgical                                                               | 75 (59.1)                   | 52 (40.9)       | 0.59 (0.37-0.94)   | 0.025   | 0.65 (0.37-1.16)     | 0.142   |
| Pediatrics                                                             | 69 (51.9)                   | 64 (48.1)       | 0.79 (0.50-1.24)   | 0.300   | 0.82 (0.47-1.44)     | 0.492   |
| Medical                                                                | 74 (60.2)                   | 49 (39.8)       | 0.56 (0.35-0.90)   | 0.016   | 0.63 (0.35-1.13)     | 0.119   |
| OPD/Screening/Triage                                                   | 57 (47.9)                   | 62 (52.1)       | 0.92 (0.58-1.48)   | 0.735   | 0.84 (0.47-1.50)     | 0.546   |
| Emergency                                                              | 55 (68.8)                   | 25 (31.3)       | 0.39 (0.22-0.68)   | 0.001   | 0.40 (0.21-0.77)     | 0.006   |
| Anesthesia/OR/IC                                                       | 31(40.8)                    | 45 (59.2)       | 1.23 (0.71-2.13)   | 0.458   | 1.11 (0.57-2.16)     | 0.761   |
| Other***                                                               | 71 (57.3)                   | 53 (42.7)       | 0.63 (0.40-1.01)   | 0.055   | 0.52 (0.28-0.96)     | 0.0.8   |
| Hospital                                                               |                             |                 |                    |         |                      |         |
| TASH                                                                   | 154 (68.8)                  | 70 (31.1)       | 0.44 (0.30-0.66)   | <0.001  | 0.49 (0.32-0.75)     | 0.001   |
| ZMH                                                                    | 64 (45.1)                   | 78 (54.9)       | 1.18 (0.77-1.82)   | 0.448   | 1.34 (0.85-2.11)     | 0.209   |
| GMH                                                                    | 38 (33.9)                   | 74 (66.1)       | 1.89 (1.17-3.06)   | 0.009   | 1.87 (1.10-3.18)     | 0.020   |
| Y12HMC                                                                 | 88 (62.2)                   | 45 (33.8)       | 0.50 (0.34-0.78)   | 0.003   | 0.52 (0.32-0.84)     | 0.008   |
| MH                                                                     | 69 (47.9)                   | 75 (52.1)       | 1.05 (0.69-1.62)   | 0.809   | 1.12 (0.72-1.75)     | 0.607   |
| SPHMMC                                                                 | 97 (49.2)                   | 100 (50.8)      | 1                  |         | 1                    |         |
| Prepared to provide direct care to COVID-19 cases                      |                             |                 |                    |         |                      |         |
| Yes                                                                    | 165 (49.5)                  | 168 (50.5)      | 1.28 (0.98-1.67)   | 0.068   | 1.04 (0.78-1.40)     | 0.776   |
| No                                                                     | 345 (55.7)                  | 274 (44.3)      | 1.0                |         | 1.0                  |         |
| Ever provided clinical care to suspected/confirmed COVID-19 patients   |                             |                 |                    |         |                      |         |
| Yes                                                                    | 147 (50.3)                  | 145 (49.7)      | 1.21 (0.92-1.59)   | 0.184   | 1.34 (1.02-1.91)     | 0.037   |
| No                                                                     | 363 (55.0)                  | 297 (45.0)      | 1.0                |         | 1.0                  |         |
| Ever participated in clinical care to Ebola, SARS and cholera patients |                             |                 |                    |         |                      |         |
| Yes                                                                    | 181 (60.3)                  | 119 (39.7)      | 0.67 (0.51-0.88)   | 0.005   | 0.66 (0.48-0.90)     | 0.009   |
| No                                                                     | 329 (50.5)                  | 323 (49.5)      | 1.0                |         | 1.0                  |         |

337

338 In the multivariable logistic regression analyses, hospitals retained the statistical significance for  
 339 the fear and worry score, where respondents from TASH (adjusted OR=0.49, 95% CI:0.32-0.75,  
 340  $P=0.001$ ) and Y12HMC (adjusted OR=0.52, 95% CI:0.32-0.84,  $P=0.008$ ) were less likely to report

341 fear and worry about COVID-19 crisis (Table 6). In contrast, respondents from GMH were more  
342 likely to fear and worry for COVID-19 crisis (adjusted OR=1.77, 95% CI:1.10-3.18) than those  
343 from the SPHMMC respondents. Healthcare professionals ever provided clinical care to suspected/  
344 confirmed COVID-19 patients were 1.34 times more likely to report fear and worry due to COVID-  
345 19 crises (OR=1.34, 95% CI:1.02-1.91,  $P=0.037$ ), however respondents who ever participated in  
346 clinical care to Ebola, SARS and cholera patients were 0.66 times less likely to report fear and  
347 worry due to COVID-19 crisis (OR=0.66, 95% CI:0.48-0.90,  $P=0.009$ ). Gender, professional  
348 category and preparedness to provide direct care to COVID-19 patients did not appear significant  
349 in the multivariable logistic regression model to predict the odds of fear and worry score for  
350 COVID-19 crisis.

351

## 352 **Discussion**

353 Since its emergence in December 2020, the COVID-19 pandemic is a global public health concern  
354 and the most current topic of discussion across every facet of life, especially among the healthcare  
355 professionals and patients. This study was conducted in Addis Ababa city during 09-26 June 2020,  
356 three months after detection of the first confirmed case of COVID-19 in Ethiopia. Addis Ababa  
357 city is the most affected part in the country. The study aimed to assess the risk perceptions and  
358 protective behaviors of COVID-19 among healthcare professionals in the city. Our study  
359 participants include medical doctors, interns, nurses, midwives, pharmacists, medical laboratory  
360 technologists, and technicians. These categories of healthcare professionals have direct or indirect  
361 close personal exposures with suspected or confirmed COVID-19 patients while performing their  
362 clinical duties.

363

364 The overwhelming majority of the participants in our study reported a high level of practice  
365 towards the prevention of COVID-19 infection particularly regarding using facemask, hand  
366 washing for at least 20 seconds, covering mouth and nose when coughing or sneezing, and  
367 avoiding touching eyes, nose, and mouth with unwashed hands as far as possible. This finding is  
368 consistent with the finding of a similar study conducted in China, where the risk of spread of  
369 COVID-19 has largely improved the infection prevention and control behaviors of healthcare  
370 professionals working in hospitals [18]. In a study conducted in Egypt, hand washing, refraining  
371 from touching eyes, mouth and nose, and using surgical facemask were the most frequently  
372 accepted preventive measures among health workers [19]. The WHO recommends the use of  
373 primary preventive measures that includes regular hand washing, social distancing, and respiratory  
374 hygiene (covering mouth and nose while coughing or sneezing) by healthcare workers in order to  
375 prevent the spread of the virus among themselves and patient's close contacts [20].

376

377 Studies conducted during the early stage of the pandemic revealed that healthcare workers had  
378 insufficient knowledge about COVID-19 pandemic to protect themselves from coronavirus  
379 infection [21]. In one study in Greece, only 25% of healthcare practitioners washed their hands  
380 after touching a patient, despite the fact that 94% of the respondents knew that SARS-CoV-2  
381 transmission could be reduced with hand washing [22]. Although hand washing is recommended  
382 for the general public in order to prevent the transmission of COVID-19, hand hygiene is  
383 mandatory for health care practitioners, in order to prevent infections, both for oneself and for the  
384 patients [23]. In the present study, the use of facemask was reported to be 93%. A recent study  
385 conducted in Addis Ababa just before our study revealed that about two-third of the healthcare  
386 workers demonstrated a poor practice of facemask utilization [24]. Similar results were reported

387 in North-East India that majority of the healthcare workers (91%) reported that they used surgical  
388 masks, 97% were using hand sanitizer and 97% participants were properly using hand hygiene  
389 [25].

390

391 In the present study, the majority of the study participants recommended mask-wearing by all  
392 healthcare professionals, all healthy people to protect themselves from coronavirus infection, and  
393 people with close contact with suspected or confirmed COVID-19. Similarly, about 87% of the  
394 respondents suggested that N95 respirator should be used by all healthcare professionals as well  
395 as by people who are being in close contact with suspected or confirmed COVID-19 patients. In  
396 Pakistan, 71% of the healthcare workers believed that wearing general medical masks was  
397 protective against COVID-19 [26], and studies also suggested that surgical masks are similarly as  
398 effective as N95 respirators if used with hand wash and other infection prevention precautions  
399 [27]. However, a rapid systematic review on the efficacy of facemasks and respirators against  
400 coronaviruses and other respiratory transmissible viruses reported that continuous use of  
401 respirators is more protective compared to the medical masks, and medical masks are more  
402 protective than cloth masks among health workers in healthcare settings [28].

403

404 This study demonstrated that about one-third of all respondents in our study either participated in  
405 direct clinical care to patients affected by an infectious disease outbreak (e.g., Ebola virus, SARS,  
406 cholera, Zika virus) (31%) or provided direct clinical care at least for one suspected or confirmed  
407 COVID-19 patients (29%) during the current COVID-19 epidemic. This percentage is higher from  
408 other studies on this subject in the early days of the COVID-19 outbreak in China [29]. A  
409 significant number (38%) of healthcare professionals in the current study expressed lack of or low  
410 level of preparedness to manage suspected or confirmed COVID-19 patients. This raises a concern

411 regarding the ability and confidence of the healthcare workers to combat COVID-19 infection.  
412 Despite these concerns, along with the shortage of PPE and inadequate training during the COVID-  
413 19, the healthcare workers continue to work with the management of suspected or confirmed  
414 COVID-19, working in the hospital setting where COVID-19 patients were admitted, risking their  
415 lives to save their patients. However, this could highlight the risk of infection among healthcare  
416 workers and cross-contamination within hospitals and could lead to a higher rate of hospital-  
417 acquired infections. Therefore, our study provides considerable insights into the necessity of  
418 immediate and determined efforts focused on training programs and providing an adequate supply  
419 of PPE to ensure the safety of health personnel during the COVID-19 pandemic [30]-

420

421 In the present study, about 88% of the healthcare professionals were afraid of being infected with  
422 the disease and about 91% were worried about the potential risk of transmitting the virus to their  
423 family and loved ones. The risk of contracting the virus was perceived to be very high at the time  
424 of the study. Healthcare workers expressed worry and fear of infection due to the contagious nature  
425 of the virus, close contact with suspected and confirmed COVID-19 patients, and infection  
426 happening to their family and colleagues. In Iran, it was found that about 92% of the healthcare  
427 workers worried about being infected with the virus and transmitting it to the family [31]. In a  
428 study conducted in Henan province of China, 89% of healthcare workers had sufficient knowledge  
429 of COVID-19, 85% were concerned about infection with the virus, and 90% followed correct  
430 practices regarding the prevention of COVID-19 [32]. About 83% of the healthcare workers in  
431 Egypt reported increased risk perception because of the concern of being infected with COVID-  
432 19 and fear of transmitting the disease to their families, and 89% stated that they were more  
433 susceptible to COVID-19 infection mainly due to the shortage of PPE [19].

434



435 In the current study, the overall risk perception expressed in fear and worry score of the study  
436 participants regarding COVID-19 crisis was considerably higher, with a mean of 28, ranging from  
437 12 to 36. Various studies have reported the psychological impact of COVID-19 on healthcare  
438 professionals [33]. A recent scoping review found that the frontline healthcare workers are at an  
439 increased risk of direct physical and mental consequences as the result of providing care to patients  
440 with COVID-19 [34]. Studies demonstrated that more than 50% of healthcare professionals report  
441 symptoms of depression, insomnia, and anxiety due to COVID-19 [35]. A recent study carried out  
442 in Pakistan on fear and anxiety among healthcare professionals reported that about three-fourth of  
443 them had fear of getting infected during the management of COVID-19 patients, and another two-  
444 third reported severe anxiety, which was particularly more common among nurses [36]. Studies  
445 also reported excessive workload, isolation, mental stress and discrimination among frontline  
446 health professionals, thus, contributing to physical exhaustion, emotional disturbance, worry and  
447 fear [37]. A Cochrane review reported the suffering of healthcare workers from work-related or  
448 occupational stress, which can be reduced by cognitive-behavioral training as well as mental and  
449 physical relaxation [38]. A multicenter study conducted among frontline nurses in China showed  
450 poor mental health during the COVID-19 outbreak, mainly due to the fear of contracting the virus  
451 and high workload [39]. Moreover, the same study revealed that nurses who were confident in  
452 their infection control knowledge and skills had lower stress levels than those who felt less  
453 prepared.

454  
455 Finally, this study had several limitations. First, the study had a potential to be affected by selection  
456 bias and eligible participants might be excluded. Second, this study was conducted in six public  
457 hospitals in Addis Ababa, and may possibly limit the generalization of the results and findings to  
458 other public and private hospitals. Third, the study focused on more general populations of

459 healthcare professionals similar to other studies [32,40] rather than healthcare workers who might  
460 have direct contact with COVID-19 patients [41]. Finally, the results of this study are based on  
461 self-reported data, and the respondents may overestimate or underestimate the responses in a way  
462 that they believe is socially acceptable rather than reporting actual or genuine answers. Despite  
463 these limitations, the results obtained provide important information to guide health  
464 communication efforts that can support prevention efforts of COVID-19 among healthcare  
465 professionals.

466

## 467 **Conclusions**

468 In conclusion, our study has illuminated the current level of risk perception and preventive  
469 practices of COVID-19 among healthcare professionals, with a special focus on those working in  
470 the clinical departments of the hospitals who have direct or indirect contact with COVID-19  
471 patients. The present study findings demonstrated that healthcare professionals participated in the  
472 study showed a universally higher preventive practices to prevent COVID-19 infections. The  
473 healthcare workers perceived high level of COVID-19 risk particularly due to shortage of PPE,  
474 and majority reported that they didn't receive any training in infection prevention and control  
475 measures since COVID-19, although they had adequate level of practice to protect themselves  
476 from the infection of novel coronavirus. Likewise, majority of the participants reported that they  
477 worried about the potential risk of becoming infected with COVID-19 and transmitting the disease  
478 to their family. The present study also was able to identify factors associated with fear and worry  
479 related to COVID-19 crisis in order to address them during the implementation of risk  
480 communication programs with the public and healthcare during the current COVID-19 pandemic.

481

482

## 483 **Acknowledgments**

484 The authors are grateful to the participating hospitals and their healthcare staff for committing their  
485 time and voluntarily filling in the questionnaire. They are also thankful to all data collectors and  
486 logistics facilitators for their time and commitment.

487

## 488 **Ethical approval and consent to participate**

489 Ethical clearance was obtained from the Institutional Review Board of the College of Health  
490 Sciences at Addis Ababa University. All participants gave their informed consent.

491

## 492 **Funding**

493 This study was funded by Addis Ababa University Thematic Research and partly supported by the  
494 School of Public Health. Publication charge for this article was waived since all the authors are  
495 from a low-income country.

496

## 497 **Contributors**

498 Conceptualization: WD, AW, WAA, WA

499 Designing of the study: WD, AW, MG, WAA, WA

500 Data curation: WD, AW

501 Statistical analysis: WD, AW

502 Field supervision: MG, WD, AW

503 Writing – original draft: WD, AW

504 Writing – review & editing: WD, AW, MG, WAA, WA

505 Substantial contribution to the interpretation of the data: WD, AW, MG, WAA, WA

506 All the authors read and approved the final manuscript.

507

508 **Competing interests**

509 The authors declare no competing interests.

510

511

512

513

514

515

516

517

518

519

520 **References**

521

522 1. WHO. Coronavirus disease (COVID-19) pandemic. 2020a. Available online:

523 <https://www.who.int/emergencies/diseases/novel-coronavirus-2019>. Accessed 11<sup>th</sup> September 2020.

524 2. Worldometers. COVID-19 Virus Pandemic (Live). <https://www.worldometers.info/coronavirus/>. 2020.

525 Last updated: September 6, 2020, 06:21 GMT.

526 3. Ethiopian Public Health Institute. National Public Health Emergency Operation Center (NPHEOC).

527 COVID-19 Pandemic Preparedness and Response. Bulletin No. 21, September 21, 2020. Addis Ababa,

528 Ethiopia.

529 4. WHO. How to Protect Health Workers Now: WHO COVID-19 Briefing. World Economic Forum.

530 Available online: [https://www.weforum.org/agenda/2020/04/10-april-who-briefing-healthworkers-](https://www.weforum.org/agenda/2020/04/10-april-who-briefing-healthworkers-covid-19-ppe-training/)

531 [covid-19-ppe-training/](https://www.weforum.org/agenda/2020/04/10-april-who-briefing-healthworkers-covid-19-ppe-training/). 2020b. Accessed 11<sup>th</sup> September 2020.

532 5. Barrett ES, Horton DB, Roy J, Gennaro ML, Brooks A, Tischfield J, et al. Prevalence of SARS-CoV-

533 2 infection in previously undiagnosed health care workers at the onset of the U.S. COVID-19 epidemic.

534 medRxiv preprint doi:<https://doi.org/10.1101/2020.04.20.20072470>. April 24, 2020.

535 6. Sikkema RS, Pas SD, Nieuwenhuijse DF, O'Toole A, Verweij JJ, van der Linden A, et al. COVID-19

536 in health-care workers in three hospitals in the south of the Netherlands: a cross-sectional study. *Lancet*

537 *Infect Dis* 2020; Published online July 2, 2020 [https://doi.org/10.1016/S1473-3099\(20\)30527-2](https://doi.org/10.1016/S1473-3099(20)30527-2).

538 7. Ing EB, Xu QA, Salimi A, Torun N. Physician deaths from corona virus (COVID-19) disease.

539 *Occupational Medicine* 2020, doi:10.1093/occmed/kqaa088.

540 8. Zhan, M, Qin, Y, Xue X, Zhu S. Death from COVID-19 of 23 healthcare workers in China. *N Engl J*

541 *Med* 2020 Apr 15 [Epub ahead of print]. doi: [10.1056/NEJMc2005696](https://doi.org/10.1056/NEJMc2005696).

542 9. Hussain ZB, Shoman H, Yau PWP, Thevendran G, Randelli F, Zhang M, Kocher MS, Norrish A,

543 Khanduja V. Protecting healthcare workers from COVID-19: learning from variation in practice and

544 policy identified through a global cross-sectional survey. *Bone Joint Open* 2020, 1-5:144–151.

545 <https://doi.org/10.1302/2046-3758.15.BJO-2020-0024.R1>.

- 546 10. WHO. Rational use of personal protective equipment (PPE) for coronavirus disease (COVID-19).  
547 Interim guidance. 2020c.
- 548 11. Shanafelt T, Ripp J, Trockel M. Understanding and Addressing Sources of Anxiety Among Health Care  
549 Professionals During the COVID-19 Pandemic. *JAMA* 2020, 323 (21):2134-37.  
550 doi:[10.1001/jama.2020.5893](https://doi.org/10.1001/jama.2020.5893).
- 551 12. Liu Q, Luo D, Haase JE, Guo Q, Wang XQ, Liu S, Xia L, Liu Z, Yang J, Yang BX. The experiences  
552 of health-care providers during the COVID-19 crisis in China: a qualitative study. *Lancet Glob Health*  
553 2020; 8:e790–98, Published Online April 29, 2020 [https://doi.org/10.1016/S2214-109X\(20\)30204-7](https://doi.org/10.1016/S2214-109X(20)30204-7).
- 554 13. Liao Q, Wu P, Wing Tak Lam W, Cowling BJ, Fielding R. Trajectories of public psycho-behavioural  
555 responses relating to influenza A(H7N9) over the winter of 2014-15 in Hong Kong. *Psychol Health*  
556 2019, 34(2):162-180. doi: 10.1080/08870446.2018.1515436. Epub 2018 Nov 15. PMID: 30430862.
- 557 14. CSA. Population Projections for Ethiopia 2007-2037. 2013, Addis  
558 Ababa, Ethiopia.
- 559 15. Cori L, Bianchi F, Cadum E, Anthonj C. Risk Perception and COVID-19. *Int J Environ Res*  
560 *Public Health* 2020, 17, 3114; doi:10.3390/ijerph17093114.
- 561 16. Dryhurst S, Schneider CR, Kerr J, Freeman ALJ, Recchia G, van der Bles AM, Spiegelhalter D, van  
562 der Linden S. Risk perceptions of COVID-19 around the world. *J Risk Res* 2020.  
563 DOI:10.1080/13669877.2020.1758193.
- 564 17. Bish A, Michie S. Demographic and attitudinal determinants of protective behaviors during a  
565 pandemic: A review. *Br J Health Psychol* 2010, 15, 797–824.
- 566 18. Lai X, Wang X, Yang Q, Xu X, Tang Y, Liu C, Tan L, Lai R, Wang H, Zhang X, Zhou Q, Chen H.  
567 Will healthcare workers improve infection prevention and control behaviors as COVID-19 risk emerges  
568 and increases, in China? *Antimicrob Resist Infect Control* 2020, 9:83. [https://doi.org/10.1186/s13756-](https://doi.org/10.1186/s13756-020-00746-1)  
569 [020-00746-1](https://doi.org/10.1186/s13756-020-00746-1).

- 570 19. Abdel Wahed WY, Hefzy EM, Ahmed MI, Hamed NS. Assessment of Knowledge, Attitudes, and  
571 Perception of Health Care Workers Regarding COVID-19, A Cross-Sectional Study from Egypt. *J*  
572 *Community Health*. 2020 Jul 7:1–10. Doi: 10.1007/s10900-020-00882-0.
- 573 20. WHO. Infection prevention and control during health care when novel coronavirus (nCoV) infection is  
574 suspected. World Health Organization: Geneva. <https://www.who.int>. 2020d. Accessed 11<sup>th</sup>  
575 September 2020.
- 576 21. Bhagvathula AS, Aldhaleei WA, Rahmani J, Mahabadi MA, Bandari DK. Knowledge and Perceptions  
577 of COVID-19 Among Health care workers: A cross-sectional study. *JMIR Public Health and*  
578 *Surveillance* 2020, 6: e19160. Doi: 10.2196/19160.
- 579 22. Papagiannis D, Malli F, Raptis DG, Papathanasiou IV, Fradelos EC, Daniil Z, Rachiotis G,  
580 Gourgoulianis KI. Assessment of Knowledge, Attitudes, and Practices towards New Coronavirus  
581 (SARS-CoV-2) of Health Care Professionals in Greece before the Outbreak Period. *Int J Environ Res*  
582 *Public Health* **2020**, *17*, 4925.
- 583 23. CDC. Clean Hands Count for Safe Healthcare. Available online:  
584 <https://www.cdc.gov/patientsafety/features/clean-hands-count.html>. 2020. Accessed 11<sup>th</sup>  
585 September 2020.
- 586 24. Tadesse T, Tesfaye T, Alemu T, Haileselassie W. Healthcare Worker’s Knowledge, Attitude, and  
587 Practice of Proper Face Mask Utilization, and Associated Factors in Police Health Facilities of Addis  
588 Ababa, Ethiopia. *J Multidiscip Healthc* 2020; 13:1203–1213.
- 589 25. Kotian RP, Debnath M, Zosangliani, D’souza B, Faujdar D. A web survey to assess the use efficacy of  
590 personnel protective materials among allied health care workers during COVID-19 pandemic at North-  
591 East India. medRxiv preprint doi: <https://doi.org/10.1101/2020.06.08.20125708>. this version posted  
592 June 9, 2020.

- 593 26. Kumar, J., Katto, M., Siddiqui, A. A., et al. Knowledge, attitude, and practices of healthcare workers  
594 regarding the use of face mask to limit the spread of the new coronavirus disease (COVID- 19).  
595 *Cureus* 2020, 12(4), e7737. <https://doi.org/10.7759/cureus.7737>.
- 596 27. Ng, K., Poon, B. H., Kiat Puar, T. H., et al. COVID-19 and the risk to health care workers: A case  
597 report. *Ann Inter Med* 2020. <https://doi.org/10.7326/l20-0175>.
- 598 28. MacIntyre CR, Chughtai AA. A rapid systematic review of the efficacy of face masks and respirators  
599 against coronaviruses and other respiratory transmissible viruses for the community, healthcare  
600 workers and sick patients. *Int J Nurs Stud* 2020; 108:103629.
- 601 29. Shi Y, Wang J, Yang Y, Wang Z, Wang G, Hashimoto K, Zhang K, Liu H. Knowledge and attitudes  
602 of medical staff in Chinese psychiatric hospitals regarding COVID-19. *Brain Behav Immun Health*  
603 2020; 4: 100064.
- 604 30. Huh S. How to train the health personnel for protecting themselves from novel coronavirus (COVID-  
605 19) infection during their patient or suspected case care. *J Educ Eval Health Prof* 2020; 17: 10.
- 606 31. Maleki S, Naja F, Farhadi K, Fakhri M, Hosseini F, Naderi M. Knowledge, Attitude and Behavior of  
607 Health Care Workers in the Prevention of COVID-19. *Research Square* 2020. DOI:  
608 <https://doi.org/10.21203/rs.3.rs-23113/v1>.
- 609 32. Zhang M, Zhou M, Tang F, Wang Y, Nie H, Zhang L, You G. Knowledge, attitude and practice  
610 regarding COVID-19 among healthcare workers in Henan, China. *J Hosp Infect* 2020, 105:183–187.
- 611 33. Chersich MF, Gray G, Fairlie L, Eichbaum Q, Mayhew S, Allwood B, et al. COVID-19 in Africa: care  
612 and protection for frontline healthcare workers. *Global Health* 2020, 16:46.  
613 <https://doi.org/10.1186/s12992-020-00574-3>.
- 614 34. Shaukat N, Ali DM, Razzak J. Physical and mental health impacts of COVID-19 on healthcare workers:  
615 a scoping review. *Int J Emerg Med* 2020; 13:40. <https://doi.org/10.1186/s12245-020-00299-5>.
- 616 35. Bo H-X, Li W, Yang Y, Wang Y, Zhang Q, Cheung T, et al. Posttraumatic stress symptoms and attitude  
617 toward crisis mental health services among clinically stable patients with COVID-19 in China.  
618 *Psychological Medicine*. 2020:1-2.



- 619 36. Saleem Z, Majeed MM, Rafique S Siddiqui Z, Ghandhi D, Tariq H. COVID-19 pandemic fear and  
620 anxiety among healthcare professionals in Pakistan. DOI: [10.21203/rs.3.rs-37608/v1](https://doi.org/10.21203/rs.3.rs-37608/v1). License [CC BY](#)  
621 [4.0](#). June 2020.
- 622 37. Kang L, Li Y, Hu S, Chen M, Yang C, Yang BX, et al. The mental health of medical workers in  
623 Wuhan, China dealing with the 2019 novel coronavirus. *The Lancet Psychiatry*. 2020;7(3):e14.
- 624 38. Ruotsalainen\_JH, Verbeek\_JH, Mariné\_A, Serra\_C. Preventing occupational stress in healthcare  
625 workers. *Cochrane Database of Systematic Reviews* 2015, Issue 4. Art. No.: CD002892. DOI:  
626 [10.1002/14651858.CD002892.pub5](https://doi.org/10.1002/14651858.CD002892.pub5).
- 627 39. Hong S, Ai M, Xu X, Wang W, Chen J, Zhang Q, Wang L, Kuang L. Immediate psychological impact  
628 on nurses working at 42 government-designated hospitals during COVID-19 outbreak in China: A  
629 cross-sectional study. *Nurs Outlook*. 2020 Jul 19. doi: [10.1016/j.outlook.2020.07.007](https://doi.org/10.1016/j.outlook.2020.07.007). Epub ahead of  
630 print. PMID: [PMC7368912](https://pubmed.ncbi.nlm.nih.gov/33011112/).
- 631 40. Huynh G, Nguyen TNH, Tran VK, Vo KN, Vo VT, Pham LA. Knowledge and attitude toward COVID-  
632 19 among healthcare workers at district 2 hospital, Ho Chi Minh city. *Asian Pac J Trop Med* 2020,  
633 13:260–265.
- 634 41. Elhadi M, Msherghi A, Alkeelani M, Zorgani A, Zaid A, Alsuyihili A, et al. Assessment of Healthcare  
635 Workers' Levels of Preparedness and Awareness Regarding COVID-19 Infection in Low-Resource  
636 Settings. *Am J Trop Med Hyg* 2020, 103(2):828–833. doi:[10.4269/ajtmh.20-0330](https://doi.org/10.4269/ajtmh.20-0330).
- 637  
638

bioRxiv preprint doi: <https://doi.org/10.1101/2020.11.04.367896>; this version posted November 4, 2020. The copyright holder for this preprint (which was not certified by peer review) is the author/funder, who has granted bioRxiv a license to display the preprint in perpetuity. It is made available under aCC-BY 4.0 International license.

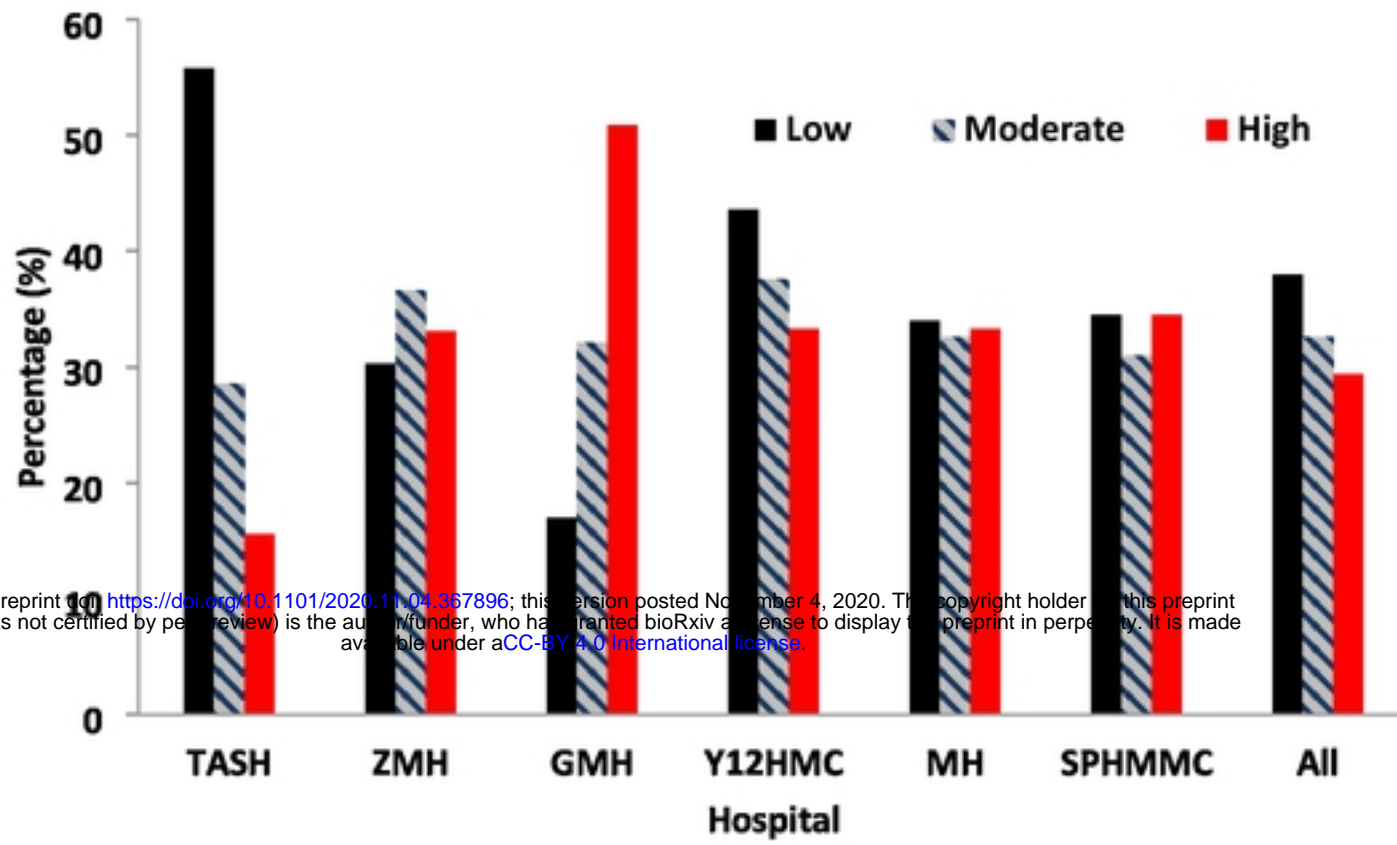

**Fig. 1. Pattern of fear and worry scores of COVID-19 crises by hospital**

bioRxiv preprint doi: <https://doi.org/10.1101/2020.11.04.367896>; this version posted November 4, 2020. The copyright holder for this preprint (which was not certified by peer review) is the author/funder, who has granted bioRxiv a license to display the preprint in perpetuity. It is made available under aCC-BY 4.0 International license.
